# Supplementary figures and images for: Alterations in Soluble Class III Peroxidases of Maize Shoots by Flooding Stress
Source: MDPI journal article supplement (doi:10.3390/proteomes2030303), 2014-06-26

## Guaiacol Peroxidase

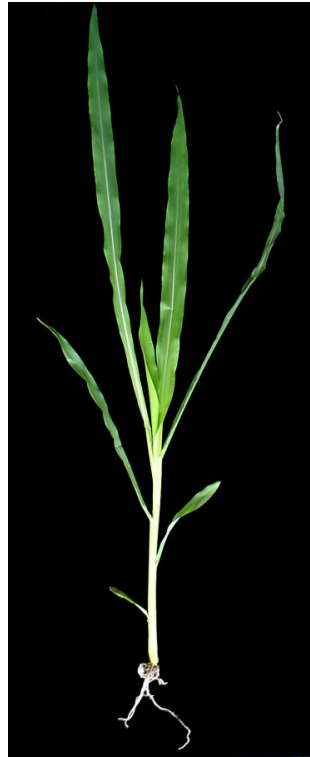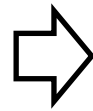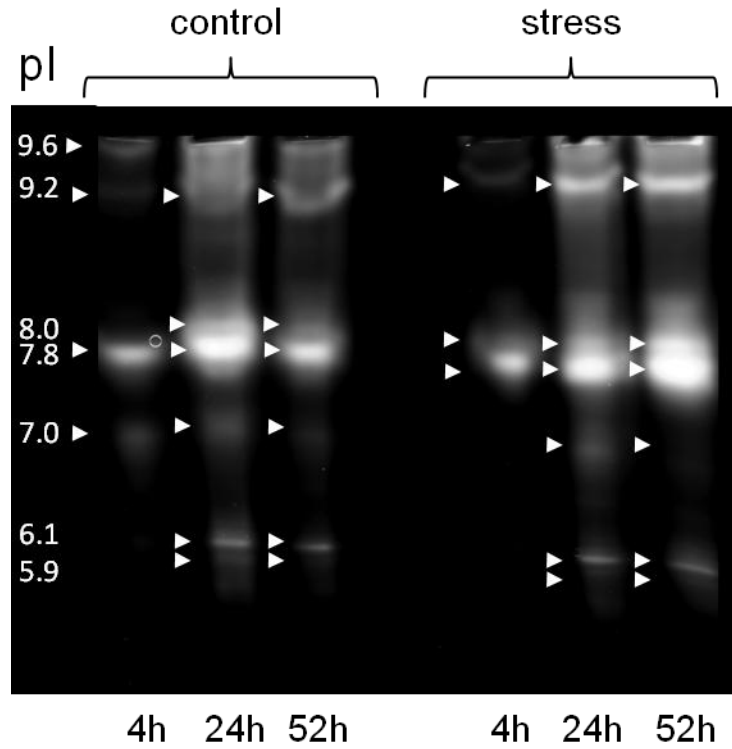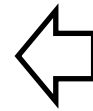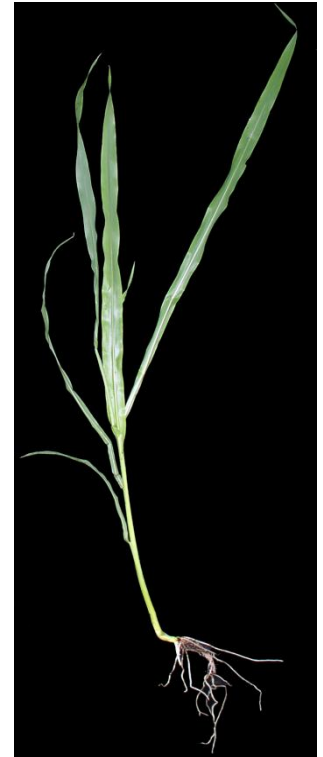

Supplement: s1 [file s1]
